# Supplementary material for: Front-of-Package-Label-Style Health Logos on Menus—Do Canadian Consumers Really Care about Menu Health Logos?
Source: MDPI journal article supplement (doi:10.3390/nu16040545), 2024-02-16
Supplement: s1 [file s1]

## Supplementary Table

Supplementary Table S1. Participant responses stratified by age group, gender, marital status, education, income, dietary restrictions and eating out frequency.

| Group                                                                                                          | Variable                              | Strongly disagree | Somewhat disagree | Neither agree nor disagree | Somewhat agree | Strongly agree | Total       | p value        |
|----------------------------------------------------------------------------------------------------------------|---------------------------------------|-------------------|-------------------|----------------------------|----------------|----------------|-------------|----------------|
| <b>Consider the following statement: I think it is important to have healthy food options when dining out.</b> |                                       |                   |                   |                            |                |                |             |                |
| Age Group                                                                                                      | The Silent Generation: Born 1928-1945 | 2 (7.4%)          | 1 (3.7%)          | 7 (25.9%)                  | 9 (33.3%)      | 8 (29.6%)      | 27 (2.5%)   | 0.02*          |
|                                                                                                                | Baby Boomers: Born 1946-1964          | 20 (5.9%)         | 13 (3.8%)         | 35 (10.3%)                 | 96 (28.2%)     | 177 (51.9%)    | 341 (32.2%) |                |
|                                                                                                                | Generation X: Born 1965-1980          | 16 (6.8%)         | 10 (4.2%)         | 25 (10.6%)                 | 81 (34.3%)     | 104 (44.1%)    | 236 (22.3%) | 0.08           |
|                                                                                                                | Generation Z: Born 1997-2012          | 1 (1.6%)          | 6 (9.4%)          | 9 (14.1%)                  | 25 (39.1%)     | 23 (35.9%)     | 64 (6.0%)   | 0.10           |
|                                                                                                                | Millennials: Born 1981-1996           | 11 (2.8%)         | 15 (3.8%)         | 48 (12.3%)                 | 138 (35.3%)    | 179 (45.8%)    | 391 (36.9%) | 0.04*          |
|                                                                                                                | Prefer not to answer                  | 0 (0%)            | 0 (0%)            | 0 (0%)                     | 1 (100.0%)     | 0 (0%)         | 1 (0.1%)    | 0.64           |
| Gender                                                                                                         | Male                                  | 24 (4.6%)         | 25 (4.8%)         | 82 (15.8%)                 | 197 (37.9%)    | 192 (36.9%)    | 520 (49.1%) | p<0.001<br>*** |
|                                                                                                                | Female                                | 25 (4.7%)         | 20 (3.8%)         | 42 (7.9%)                  | 152 (28.6%)    | 293 (55.1%)    | 532 (50.2%) |                |
|                                                                                                                | Other                                 | 0 (0%)            | 0 (0%)            | 0 (0%)                     | 0 (0%)         | 3 (100.0%)     | 3 (0.3%)    |                |
|                                                                                                                | Prefer not to answer                  | 1 (25.0%)         | 0 (0%)            | 0 (0%)                     | 0 (0%)         | 3 (75.0%)      | 4 (0.4%)    | 0.36           |
| Marital Status                                                                                                 | Single                                | 15 (5.2%)         | 15 (5.2%)         | 41 (14.3%)                 | 94 (32.9%)     | 121 (42.3%)    | 286 (27.0%) | 0.05           |
|                                                                                                                | Married                               | 27 (4.2%)         | 27 (4.2%)         | 73 (11.4%)                 | 209 (32.5%)    | 307 (47.7%)    | 643 (60.8%) |                |
|                                                                                                                | Prefer not to answer                  | 2 (7.4%)          | 0 (0%)            | 2 (7.4%)                   | 7 (25.9%)      | 16 (59.3%)     | 27 (2.6%)   | 0.10           |
|                                                                                                                | Separated / Divorced                  | 6 (7.6%)          | 2 (2.5%)          | 6 (7.6%)                   | 30 (38.0%)     | 35 (44.3%)     | 79 (7.5%)   | 0.49           |
|                                                                                                                | Widowed                               | 0 (0%)            | 1 (4.3%)          | 2 (8.7%)                   | 9 (39.1%)      | 11 (47.8%)     | 23 (2.2%)   | 0.22           |

|                     |                                                                                             |           |           |            |             |             |             |       |
|---------------------|---------------------------------------------------------------------------------------------|-----------|-----------|------------|-------------|-------------|-------------|-------|
| Education           | Did not graduate high school                                                                | 4 (25.0%) | 0 (0%)    | 1 (6.2%)   | 5 (31.2%)   | 6 (37.5%)   | 16 (1.5%)   |       |
|                     | Community college, technical college, or CEGEP                                              | 12 (4.7%) | 11 (4.3%) | 36 (14.2%) | 80 (31.6%)  | 114 (45.1%) | 253 (23.9%) | 0.19  |
|                     | High school graduate certificate or equivalent                                              | 9 (6.6%)  | 10 (7.3%) | 22 (16.1%) | 46 (33.6%)  | 50 (36.5%)  | 137 (12.9%) | 0.57  |
|                     | Post-graduate degree                                                                        | 9 (5.0%)  | 5 (2.8%)  | 14 (7.8%)  | 53 (29.6%)  | 98 (54.7%)  | 179 (16.9%) | 0.04* |
|                     | Trades certificate or diploma                                                               | 2 (2.4%)  | 6 (7.1%)  | 16 (18.8%) | 38 (44.7%)  | 23 (27.1%)  | 85 (8.0%)   | 0.65  |
|                     | University (undergraduate degree)                                                           | 14 (3.6%) | 13 (3.3%) | 35 (9.0%)  | 127 (32.6%) | 200 (51.4%) | 389 (36.7%) | 0.04* |
| Income              | Under \$25,000                                                                              | 3 (5.7%)  | 3 (5.7%)  | 10 (18.9%) | 12 (22.6%)  | 25 (47.2%)  | 53 (5.0%)   |       |
|                     | \$100,000 to \$124,000                                                                      | 8 (5.8%)  | 8 (5.8%)  | 14 (10.1%) | 44 (31.9%)  | 64 (46.4%)  | 138 (13.0%) | 0.71  |
|                     | \$125,000 to \$149,999                                                                      | 7 (5.6%)  | 6 (4.8%)  | 10 (8.1%)  | 41 (33.1%)  | 60 (48.4%)  | 124 (11.7%) | 0.76  |
|                     | \$25,000 to \$49,999                                                                        | 6 (4.9%)  | 1 (0.8%)  | 11 (9.0%)  | 45 (36.9%)  | 59 (48.4%)  | 122 (11.5%) | 0.64  |
|                     | \$50,000 to \$74,999                                                                        | 8 (5.0%)  | 2 (1.3%)  | 18 (11.3%) | 53 (33.3%)  | 78 (49.1%)  | 159 (15.0%) | 0.68  |
|                     | \$75,000 to \$99,999                                                                        | 3 (2.1%)  | 9 (6.2%)  | 25 (17.2%) | 58 (40.0%)  | 50 (34.5%)  | 145 (13.7%) | 0.18  |
|                     | Over \$150,000                                                                              | 8 (4.2%)  | 8 (4.2%)  | 18 (9.5%)  | 66 (34.9%)  | 89 (47.1%)  | 189 (17.8%) | 0.51  |
|                     | Prefer not to answer                                                                        | 7 (5.4%)  | 8 (6.2%)  | 18 (13.8%) | 31 (23.8%)  | 66 (50.8%)  | 130 (12.3%) | 0.56  |
| Dietary Restriction | No dietary restriction                                                                      | 31 (4.3%) | 30 (4.2%) | 88 (12.3%) | 253 (35.3%) | 315 (43.9%) | 717 (67.7%) |       |
|                     | Others                                                                                      | 2 (4.9%)  | 2 (4.9%)  | 6 (14.6%)  | 4 (9.8%)    | 27 (65.9%)  | 41 (3.9%)   | 0.24  |
|                     | Yes, Allergies and/or intolerances, and faith-based restrictions (e.g. Halal, Kosher, etc.) | 2 (13.3%) | 2 (13.3%) | 3 (20.0%)  | 5 (33.3%)   | 3 (20.0%)   | 15 (1.4%)   | 0.02* |

|                                                                                                                                |                                                          |                  |                  |                    |                    |                    |                      |       |
|--------------------------------------------------------------------------------------------------------------------------------|----------------------------------------------------------|------------------|------------------|--------------------|--------------------|--------------------|----------------------|-------|
|                                                                                                                                | Yes, faith-based restrictions (e.g. Halal, Kosher, etc.) | 1 (5.9%)         | 0 (0%)           | 1 (5.9%)           | 7 (41.2%)          | 8 (47.1%)          | 17 (1.6%)            | 0.67  |
|                                                                                                                                | Yes, food allergies and/or intolerances                  | 14 (5.2%)        | 11 (4.1%)        | 25 (9.3%)          | 81 (30.1%)         | 138 (51.3%)        | 269 (25.4%)          | 0.36  |
| Eating out Frequency                                                                                                           | Monthly                                                  | 15 (4.8%)        | 12 (3.8%)        | 24 (7.7%)          | 99 (31.6%)         | 163 (52.1%)        | 313 (29.5%)          |       |
|                                                                                                                                | 2-3 times a week                                         | 7 (4.7%)         | 8 (5.4%)         | 15 (10.1%)         | 53 (35.8%)         | 65 (43.9%)         | 148 (14.0%)          | 0.56  |
|                                                                                                                                | Bi-weekly                                                | 15 (5.4%)        | 10 (3.6%)        | 38 (13.7%)         | 92 (33.2%)         | 122 (44.0%)        | 277 (26.1%)          | 0.18  |
|                                                                                                                                | Daily                                                    | 0 (0%)           | 0 (0%)           | 1 (5.0%)           | 9 (45.0%)          | 10 (50.0%)         | 20 (1.9%)            | 0.49  |
|                                                                                                                                | Weekly                                                   | 13 (4.3%)        | 15 (5.0%)        | 46 (15.2%)         | 97 (32.1%)         | 131 (43.4%)        | 302 (28.5%)          | 0.06  |
|                                                                                                                                | <b>Total</b>                                             | <b>50 (4.7%)</b> | <b>45 (4.2%)</b> | <b>124 (11.7%)</b> | <b>350 (33.0%)</b> | <b>491 (46.3%)</b> | <b>1060 (100.0%)</b> |       |
| <b>Consider the following statement: The presence of a health logo on menu influences my decisions to choose a restaurant.</b> |                                                          |                  |                  |                    |                    |                    |                      |       |
| Age Group                                                                                                                      | The Silent Generation: Born 1928-1945                    | 5 (20.0%)        | 4 (16.0%)        | 12 (48.0%)         | 4 (16.0%)          | 0 (0%)             | 25 (2.4%)            |       |
|                                                                                                                                | Baby Boomers: Born 1946-1964                             | 42 (12.5%)       | 41 (12.2%)       | 139 (41.2%)        | 97 (28.8%)         | 18 (5.3%)          | 337 (32.7%)          | 0.08  |
|                                                                                                                                | Generation X: Born 1965-1980                             | 41 (17.7%)       | 37 (16.0%)       | 86 (37.2%)         | 51 (22.1%)         | 16 (6.9%)          | 231 (22.4%)          | 0.38  |
|                                                                                                                                | Generation Z: Born 1997-2012                             | 8 (12.7%)        | 10 (15.9%)       | 29 (46.0%)         | 12 (19.0%)         | 4 (6.3%)           | 63 (6.1%)            | 0.18  |
|                                                                                                                                | Millennials: Born 1981-1996                              | 79 (21.1%)       | 62 (16.6%)       | 133 (35.6%)        | 91 (24.3%)         | 9 (2.4%)           | 374 (36.3%)          | 0.70  |
|                                                                                                                                | Prefer not to answer                                     | 0 (0%)           | 0 (0%)           | 1 (100.0%)         | 0 (0%)             | 0 (0%)             | 1 (0.1%)             | 0.89  |
|                                                                                                                                |                                                          | 100              |                  |                    |                    |                    |                      |       |
| Gender                                                                                                                         | Male                                                     | (19.9%)          | 80 (15.9%)       | 196 (39.0%)        | 107 (21.3%)        | 20 (4.0%)          | 503 (48.8%)          |       |
|                                                                                                                                | Female                                                   | 74 (14.2%)       | 74 (14.2%)       | 200 (38.5%)        | 146 (28.1%)        | 26 (5.0%)          | 520 (50.5%)          | 0.01* |
|                                                                                                                                | Other                                                    | 0 (0%)           | 0 (0%)           | 2 (66.7%)          | 1 (33.3%)          | 0 (0%)             | 3 (0.3%)             | 0.26  |
|                                                                                                                                | Prefer not to answer                                     | 1 (25.0%)        | 0 (0%)           | 1 (25.0%)          | 1 (25.0%)          | 1 (25.0%)          | 4 (0.4%)             | 0.33  |
| Marital Status                                                                                                                 | Single                                                   | 53 (19.2%)       | 57 (20.7%)       | 99 (35.9%)         | 59 (21.4%)         | 8 (2.9%)           | 276 (26.8%)          |       |
|                                                                                                                                | Married                                                  | 96 (15.4%)       | 86 (13.8%)       | 252 (40.3%)        | 159 (25.4%)        | 32 (5.1%)          | 625 (60.7%)          | 0.02* |

|                     |                                                |             |             |             |             |           |             |      |
|---------------------|------------------------------------------------|-------------|-------------|-------------|-------------|-----------|-------------|------|
|                     | Separated / Divorced                           | 18 (23.1%)  | 8 (10.3%)   | 27 (34.6%)  | 20 (25.6%)  | 5 (6.4%)  | 78 (7.6%)   | 0.57 |
|                     | Widowed                                        | 3 (13.0%)   | 2 (8.7%)    | 11 (47.8%)  | 7 (30.4%)   | 0 (0%)    | 23 (2.2%)   | 0.38 |
|                     | Prefer not to answer                           | 5 (18.5%)   | 1 (3.7%)    | 10 (37.0%)  | 9 (33.3%)   | 2 (7.4%)  | 27 (2.6%)   | 0.06 |
| Education           | Did not graduate high school                   | 3 (20.0%)   | 3 (20.0%)   | 6 (40.0%)   | 3 (20.0%)   | 0 (0%)    | 15 (1.5%)   |      |
|                     | Community college, technical college, or CEGEP | 35 (14.4%)  | 30 (12.3%)  | 103 (42.4%) | 63 (25.9%)  | 12 (4.9%) | 243 (23.6%) | 0.25 |
|                     | High school graduate certificate or equivalent | 24 (18.3%)  | 24 (18.3%)  | 59 (45.0%)  | 17 (13.0%)  | 7 (5.3%)  | 131 (12.7%) | 0.92 |
|                     | Post-graduate degree                           | 29 (16.3%)  | 27 (15.2%)  | 64 (36.0%)  | 48 (27.0%)  | 10 (5.6%) | 178 (17.3%) | 0.26 |
|                     | Trades certificate or diploma                  | 17 (20.2%)  | 13 (15.5%)  | 38 (45.2%)  | 16 (19.0%)  | 0 (0%)    | 84 (8.2%)   | 0.68 |
|                     | University (undergraduate degree)              | 67 (17.7%)  | 57 (15.0%)  | 129 (34.0%) | 108 (28.5%) | 18 (4.7%) | 379 (36.8%) | 0.28 |
| Income              | Under \$25,000                                 | 7 (14.3%)   | 9 (18.4%)   | 19 (38.8%)  | 11 (22.4%)  | 3 (6.1%)  | 49 (4.8%)   |      |
|                     | \$100,000 to \$124,000                         | 24 (18.0%)  | 20 (15.0%)  | 56 (42.1%)  | 30 (22.6%)  | 3 (2.3%)  | 133 (12.9%) | 0.31 |
|                     | \$125,000 to \$149,999                         | 20 (16.4%)  | 23 (18.9%)  | 46 (37.7%)  | 29 (23.8%)  | 4 (3.3%)  | 122 (11.8%) | 0.26 |
|                     | \$25,000 to \$49,999                           | 24 (20.0%)  | 16 (13.3%)  | 43 (35.8%)  | 31 (25.8%)  | 6 (5.0%)  | 120 (11.6%) | 0.62 |
|                     | \$50,000 to \$74,999                           | 27 (17.9%)  | 22 (14.6%)  | 59 (39.1%)  | 38 (25.2%)  | 5 (3.3%)  | 151 (14.6%) | 0.50 |
|                     | \$75,000 to \$99,999                           | 22 (15.4%)  | 19 (13.3%)  | 66 (46.2%)  | 30 (21.0%)  | 6 (4.2%)  | 143 (13.9%) | 0.52 |
|                     | Over \$150,000                                 | 30 (16.1%)  | 30 (16.1%)  | 60 (32.3%)  | 57 (30.6%)  | 9 (4.8%)  | 186 (18.0%) | 0.61 |
|                     | Prefer not to answer                           | 21 (16.5%)  | 15 (11.8%)  | 51 (40.2%)  | 29 (22.8%)  | 11 (8.7%) | 127 (12.3%) | 0.67 |
| Dietary Restriction |                                                | 128 (18.3%) | 109 (15.6%) | 269 (38.4%) | 165 (23.6%) | 29 (4.1%) | 700 (67.9%) |      |
|                     | No dietary restriction                         |             |             |             |             |           |             |      |
|                     | Others                                         | 3 (8.1%)    | 5 (13.5%)   | 16 (43.2%)  | 10 (27.0%)  | 3 (8.1%)  | 37 (3.6%)   | 0.09 |
|                     | Yes, Allergies and/or intolerances, and        | 4 (26.7%)   | 2 (13.3%)   | 2 (13.3%)   | 7 (46.7%)   | 0 (0%)    | 15 (1.5%)   | 0.69 |

|                      |                                                          |                    |                    |                    |                    |                  |                      |      |
|----------------------|----------------------------------------------------------|--------------------|--------------------|--------------------|--------------------|------------------|----------------------|------|
|                      | faith-based restrictions (e.g. Halal, Kosher, etc.)      |                    |                    |                    |                    |                  |                      |      |
|                      | Yes, faith-based restrictions (e.g. Halal, Kosher, etc.) | 3 (17.6%)          | 0 (0%)             | 6 (35.3%)          | 6 (35.3%)          | 2 (11.8%)        | 17 (1.6%)            | 0.07 |
|                      | Yes, food allergies and/or intolerances                  | 37 (14.1%)         | 38 (14.5%)         | 107 (40.8%)        | 67 (25.6%)         | 13 (5.0%)        | 262 (25.4%)          | 0.10 |
| Eating out Frequency | Monthly                                                  | 48 (15.8%)         | 41 (13.5%)         | 127 (41.9%)        | 78 (25.7%)         | 9 (3.0%)         | 303 (29.4%)          |      |
|                      | 2-3 times a week                                         | 22 (15.6%)         | 25 (17.7%)         | 54 (38.3%)         | 34 (24.1%)         | 6 (4.3%)         | 141 (13.7%)          | 0.54 |
|                      | Bi-weekly                                                | 46 (17.2%)         | 42 (15.7%)         | 97 (36.2%)         | 68 (25.4%)         | 15 (5.6%)        | 268 (26.0%)          | 0.47 |
|                      | Daily                                                    | 3 (15.0%)          | 5 (25.0%)          | 7 (35.0%)          | 4 (20.0%)          | 1 (5.0%)         | 20 (1.9%)            | 0.90 |
|                      | Weekly                                                   | 56 (18.7%)         | 41 (13.7%)         | 115 (38.5%)        | 71 (23.7%)         | 16 (5.4%)        | 299 (29.0%)          | 0.53 |
|                      | <b>Total</b>                                             | <b>175 (17.0%)</b> | <b>154 (14.9%)</b> | <b>400 (38.8%)</b> | <b>255 (24.7%)</b> | <b>47 (4.6%)</b> | <b>1031 (100.0%)</b> |      |

**Consider the following statement: The people I am eating with influence my decision to choose dishes with and without a health logo.**

|           |                                       |             |             |             |            |           |             |      |
|-----------|---------------------------------------|-------------|-------------|-------------|------------|-----------|-------------|------|
| Age Group | The Silent Generation: Born 1928-1945 | 7 (28.0%)   | 3 (12.0%)   | 11 (44.0%)  | 4 (16.0%)  | 0 (0%)    | 25 (2.4%)   |      |
|           | Baby Boomers: Born 1946-1964          | 133 (39.5%) | 57 (16.9%)  | 103 (30.6%) | 39 (11.6%) | 5 (1.5%)  | 337 (32.8%) | 0.26 |
|           | Generation X: Born 1965-1980          | 81 (35.2%)  | 45 (19.6%)  | 64 (27.8%)  | 34 (14.8%) | 6 (2.6%)  | 230 (22.4%) | 0.26 |
|           | Generation Z: Born 1997-2012          | 9 (14.5%)   | 15 (24.2%)  | 18 (29.0%)  | 16 (25.8%) | 4 (6.5%)  | 62 (6.0%)   | 0.40 |
|           | Millennials: Born 1981-1996           | 91 (24.3%)  | 80 (21.4%)  | 102 (27.3%) | 81 (21.7%) | 20 (5.3%) | 374 (36.3%) | 0.91 |
|           | Prefer not to answer                  | 0 (0%)      | 0 (0%)      | 1 (100.0%)  | 0 (0%)     | 0 (0%)    | 1 (0.1%)    | 0.86 |
|           |                                       | 150         |             |             |            |           |             |      |
| Gender    | Male                                  | (29.9%)     | 101 (20.2%) | 144 (28.7%) | 87 (17.4%) | 19 (3.8%) | 501 (48.7%) |      |
|           | Female                                | 168 (32.3%) | 99 (19.0%)  | 152 (29.2%) | 85 (16.3%) | 16 (3.1%) | 520 (50.6%) | 0.53 |

|                |                                                |                   |             |             |             |           |             |      |
|----------------|------------------------------------------------|-------------------|-------------|-------------|-------------|-----------|-------------|------|
|                | Other                                          | 1 (33.3%)         | 0 (0%)      | 1 (33.3%)   | 1 (33.3%)   | 0 (0%)    | 3 (0.3%)    | 0.44 |
|                | Prefer not to answer                           | 2 (50.0%)         | 0 (0%)      | 1 (25.0%)   | 1 (25.0%)   | 0 (0%)    | 4 (0.4%)    | 0.80 |
| Marital Status | Single                                         | 68 (24.6%)<br>203 | 65 (23.6%)  | 83 (30.1%)  | 49 (17.8%)  | 11 (4.0%) | 276 (26.9%) |      |
|                | Married                                        | (32.6%)           | 118 (18.9%) | 174 (27.9%) | 108 (17.3%) | 20 (3.2%) | 623 (60.7%) | 0.90 |
|                | Separated / Divorced                           | 36 (46.2%)        | 12 (15.4%)  | 20 (25.6%)  | 8 (10.3%)   | 2 (2.6%)  | 78 (7.6%)   | 0.27 |
|                | Widowed                                        | 7 (30.4%)         | 3 (13.0%)   | 9 (39.1%)   | 4 (17.4%)   | 0 (0%)    | 23 (2.2%)   | 0.50 |
|                | Prefer not to answer                           | 6 (22.2%)         | 2 (7.4%)    | 12 (44.4%)  | 5 (18.5%)   | 2 (7.4%)  | 27 (2.6%)   | 0.05 |
| Education      | Did not graduate high school                   | 7 (46.7%)         | 2 (13.3%)   | 3 (20.0%)   | 2 (13.3%)   | 1 (6.7%)  | 15 (1.5%)   |      |
|                | Community college, technical college, or CEGEP | 82 (33.7%)        | 48 (19.8%)  | 71 (29.2%)  | 37 (15.2%)  | 5 (2.1%)  | 243 (23.6%) | 0.47 |
|                | High school graduate certificate or equivalent | 52 (39.7%)        | 19 (14.5%)  | 45 (34.4%)  | 12 (9.2%)   | 3 (2.3%)  | 131 (12.7%) | 0.75 |
|                | Post-graduate degree                           | 59 (33.1%)        | 34 (19.1%)  | 46 (25.8%)  | 33 (18.5%)  | 6 (3.4%)  | 178 (17.3%) | 0.48 |
|                | Trades certificate or diploma                  | 24 (28.6%)        | 17 (20.2%)  | 34 (40.5%)  | 7 (8.3%)    | 2 (2.4%)  | 84 (8.2%)   | 0.53 |
|                | University (undergraduate degree)              | 97 (25.7%)        | 80 (21.2%)  | 99 (26.3%)  | 83 (22.0%)  | 18 (4.8%) | 377 (36.7%) | 0.22 |
| Income         | Under \$25,000                                 | 13 (26.5%)        | 8 (16.3%)   | 20 (40.8%)  | 7 (14.3%)   | 1 (2.0%)  | 49 (4.8%)   |      |
|                | \$100,000 to \$124,000                         | 39 (29.3%)        | 23 (17.3%)  | 40 (30.1%)  | 23 (17.3%)  | 8 (6.0%)  | 133 (12.9%) | 0.62 |
|                | \$125,000 to \$149,999                         | 43 (35.5%)        | 20 (16.5%)  | 32 (26.4%)  | 21 (17.4%)  | 5 (4.1%)  | 121 (11.8%) | 0.22 |
|                | \$25,000 to \$49,999                           | 48 (40.0%)        | 20 (16.7%)  | 35 (29.2%)  | 12 (10.0%)  | 5 (4.2%)  | 120 (11.7%) | 0.07 |
|                | \$50,000 to \$74,999                           | 45 (29.8%)        | 35 (23.2%)  | 46 (30.5%)  | 21 (13.9%)  | 4 (2.6%)  | 151 (14.7%) | 0.35 |
|                | \$75,000 to \$99,999                           | 38 (26.6%)        | 32 (22.4%)  | 43 (30.1%)  | 24 (16.8%)  | 6 (4.2%)  | 143 (13.9%) | 0.61 |
|                | Over \$150,000                                 | 53 (28.6%)        | 37 (20.0%)  | 42 (22.7%)  | 50 (27.0%)  | 3 (1.6%)  | 185 (18.0%) | 0.87 |
|                | Prefer not to answer                           | 42 (33.1%)        | 25 (19.7%)  | 41 (32.3%)  | 16 (12.6%)  | 3 (2.4%)  | 127 (12.3%) | 0.26 |

|                      |                                                                                             |                    |                    |                    |                    |                  |                      |       |
|----------------------|---------------------------------------------------------------------------------------------|--------------------|--------------------|--------------------|--------------------|------------------|----------------------|-------|
| Dietary Restriction  | No dietary restriction                                                                      | 221 (31.6%)        | 131 (18.7%)        | 206 (29.5%)        | 119 (17.0%)        | 22 (3.1%)        | 699 (67.9%)          | 0.69  |
|                      | Others                                                                                      | 12 (32.4%)         | 9 (24.3%)          | 10 (27.0%)         | 5 (13.5%)          | 1 (2.7%)         | 37 (3.6%)            |       |
|                      | Yes, Allergies and/or intolerances, and faith-based restrictions (e.g. Halal, Kosher, etc.) | 4 (26.7%)          | 5 (33.3%)          | 1 (6.7%)           | 3 (20.0%)          | 2 (13.3%)        | 15 (1.5%)            | 0.81  |
|                      | Yes, faith-based restrictions (e.g. Halal, Kosher, et.)                                     | 4 (23.5%)          | 3 (17.6%)          | 7 (41.2%)          | 2 (11.8%)          | 1 (5.9%)         | 17 (1.7%)            | 0.86  |
|                      | Yes, food allergies and/or intolerances                                                     | 80 (30.7%)         | 52 (19.9%)         | 75 (28.7%)         | 45 (17.2%)         | 9 (3.4%)         | 261 (25.4%)          | 0.90  |
|                      |                                                                                             |                    |                    |                    |                    |                  |                      |       |
| Eating out Frequency | Monthly                                                                                     | 108 (35.8%)        | 61 (20.2%)         | 89 (29.5%)         | 42 (13.9%)         | 2 (0.7%)         | 302 (29.3%)          | 0.02* |
|                      | 2-3 times a week                                                                            | 35 (24.8%)         | 24 (17.0%)         | 41 (29.1%)         | 31 (22.0%)         | 10 (7.1%)        | 141 (13.7%)          |       |
|                      | Bi-weekly                                                                                   | 79 (29.6%)         | 62 (23.2%)         | 72 (27.0%)         | 45 (16.9%)         | 9 (3.4%)         | 267 (25.9%)          | 0.36  |
|                      | Daily                                                                                       | 5 (25.0%)          | 2 (10.0%)          | 5 (25.0%)          | 6 (30.0%)          | 2 (10.0%)        | 20 (1.9%)            | 0.03* |
|                      | Weekly                                                                                      | 94 (31.4%)         | 51 (17.1%)         | 92 (30.8%)         | 50 (16.7%)         | 12 (4.0%)        | 299 (29.1%)          | 0.50  |
|                      | <b>Total</b>                                                                                | <b>321 (31.2%)</b> | <b>200 (19.4%)</b> | <b>299 (29.1%)</b> | <b>174 (16.9%)</b> | <b>35 (3.4%)</b> | <b>1029 (100.0%)</b> |       |

**Consider the following statement: I would like to see a warning label like that for the prepackaged foods on restaurant menu items.**

|           |                                       |            |           |            |             |            |             |      |
|-----------|---------------------------------------|------------|-----------|------------|-------------|------------|-------------|------|
| Age Group | The Silent Generation: Born 1928-1945 | 1 (4.0%)   | 1 (4.0%)  | 10 (40.0%) | 8 (32.0%)   | 5 (20.0%)  | 25 (2.4%)   | 0.33 |
|           | Baby Boomers: Born 1946-1964          | 17 (5.1%)  | 26 (7.7%) | 72 (21.4%) | 123 (36.6%) | 98 (29.2%) | 336 (32.7%) |      |
|           | Generation X: Born 1965-1980          | 23 (10.0%) | 19 (8.2%) | 62 (26.8%) | 73 (31.6%)  | 54 (23.4%) | 231 (22.5%) | 0.85 |
|           | Generation Z: Born 1997-2012          | 2 (3.2%)   | 6 (9.5%)  | 11 (17.5%) | 28 (44.4%)  | 16 (25.4%) | 63 (6.1%)   | 0.42 |
|           |                                       |            |           |            |             |            |             |      |

|                |                                                |            |            |             |             |             |             |       |
|----------------|------------------------------------------------|------------|------------|-------------|-------------|-------------|-------------|-------|
|                | Millennials: Born 1981-1996                    | 36 (9.7%)  | 36 (9.7%)  | 94 (25.3%)  | 131 (35.2%) | 75 (20.2%)  | 372 (36.2%) | 0.72  |
|                | Prefer not to answer                           | 0 (0%)     | 0 (0%)     | 0 (0%)      | 0 (0%)      | 1 (100.0%)  | 1 (0.1%)    |       |
| Gender         | Male                                           | 41 (8.2%)  | 41 (8.2%)  | 148 (29.5%) | 162 (32.3%) | 109 (21.8%) | 501 (48.8%) | 0.01* |
|                | Female                                         | 37 (7.1%)  | 46 (8.9%)  | 101 (19.5%) | 198 (38.2%) | 137 (26.4%) | 519 (50.5%) |       |
|                | Other                                          | 0 (0%)     | 0 (0%)     | 0 (0%)      | 2 (66.7%)   | 1 (33.3%)   | 3 (0.3%)    | 0.25  |
|                | Prefer not to answer                           | 1 (25.0%)  | 1 (25.0%)  | 0 (0%)      | 0 (0%)      | 2 (50.0%)   | 4 (0.4%)    | 0.78  |
| Marital Status | Single                                         | 19 (6.9%)  | 25 (9.1%)  | 72 (26.1%)  | 96 (34.8%)  | 64 (23.2%)  | 276 (26.9%) | 0.95  |
|                | Married                                        | 47 (7.6%)  | 56 (9.0%)  | 144 (23.2%) | 222 (35.7%) | 153 (24.6%) | 622 (60.6%) |       |
|                | Separated / Divorced                           | 9 (11.5%)  | 4 (5.1%)   | 20 (25.6%)  | 24 (30.8%)  | 21 (26.9%)  | 78 (7.6%)   | 0.52  |
|                | Widowed                                        | 2 (8.7%)   | 2 (8.7%)   | 4 (17.4%)   | 9 (39.1%)   | 6 (26.1%)   | 23 (2.2%)   | 0.55  |
|                | Prefer not to answer                           | 2 (7.4%)   | 0 (0%)     | 8 (29.6%)   | 12 (44.4%)  | 5 (18.5%)   | 27 (2.6%)   | 0.98  |
| Education      | Did not graduate high school                   | 3 (20.0%)  | 1 (6.7%)   | 2 (13.3%)   | 3 (20.0%)   | 6 (40.0%)   | 15 (1.5%)   | 0.78  |
|                | Community college, technical college, or CEGEP | 20 (8.2%)  | 15 (6.2%)  | 68 (28.0%)  | 87 (35.8%)  | 53 (21.8%)  | 243 (23.7%) |       |
|                | High school graduate certificate or equivalent | 8 (6.2%)   | 12 (9.3%)  | 30 (23.3%)  | 45 (34.9%)  | 34 (26.4%)  | 129 (12.6%) | 0.99  |
|                | Post-graduate degree                           | 20 (11.3%) | 21 (11.9%) | 31 (17.5%)  | 58 (32.8%)  | 47 (26.6%)  | 177 (17.2%) | 0.93  |
|                | Trades certificate or diploma                  | 4 (4.8%)   | 6 (7.1%)   | 32 (38.1%)  | 33 (39.3%)  | 9 (10.7%)   | 84 (8.2%)   | 0.56  |
|                | University (undergraduate degree)              | 24 (6.3%)  | 33 (8.7%)  | 85 (22.4%)  | 137 (36.1%) | 100 (26.4%) | 379 (36.9%) | 0.83  |
| Income         | Under \$25,000                                 | 3 (6.2%)   | 4 (8.3%)   | 16 (33.3%)  | 10 (20.8%)  | 15 (31.2%)  | 48 (4.7%)   | 0.92  |
|                | \$100,000 to \$124,000                         | 11 (8.3%)  | 12 (9.0%)  | 31 (23.3%)  | 48 (36.1%)  | 31 (23.3%)  | 133 (12.9%) |       |
|                | \$125,000 to \$149,999                         | 14 (11.5%) | 12 (9.8%)  | 29 (23.8%)  | 44 (36.1%)  | 23 (18.9%)  | 122 (11.9%) | 0.40  |
|                | \$25,000 to \$49,999                           | 12 (10.1%) | 7 (5.9%)   | 21 (17.6%)  | 45 (37.8%)  | 34 (28.6%)  | 119 (11.6%) | 0.60  |



|                      |                                                                                             |                  |                  |                    |                    |                    |                      |      |
|----------------------|---------------------------------------------------------------------------------------------|------------------|------------------|--------------------|--------------------|--------------------|----------------------|------|
|                      | \$50,000 to \$74,999                                                                        | 11 (7.3%)        | 15 (10.0%)       | 40 (26.7%)         | 45 (30.0%)         | 39 (26.0%)         | 150 (14.6%)          | 0.81 |
|                      | \$75,000 to \$99,999                                                                        | 8 (5.6%)         | 10 (6.9%)        | 40 (27.8%)         | 58 (40.3%)         | 28 (19.4%)         | 144 (14.0%)          | 0.87 |
|                      | Over \$150,000                                                                              | 10 (5.4%)        | 19 (10.3%)       | 44 (23.8%)         | 65 (35.1%)         | 47 (25.4%)         | 185 (18.0%)          | 0.79 |
|                      | Prefer not to answer                                                                        | 10 (7.9%)        | 9 (7.1%)         | 28 (22.0%)         | 48 (37.8%)         | 32 (25.2%)         | 127 (12.4%)          | 0.81 |
| Dietary Restriction  | No dietary restriction                                                                      | 55 (7.9%)        | 52 (7.4%)        | 179 (25.6%)        | 251 (36.0%)        | 161 (23.1%)        | 698 (68.0%)          |      |
|                      | Others                                                                                      | 3 (8.6%)         | 2 (5.7%)         | 7 (20.0%)          | 9 (25.7%)          | 14 (40.0%)         | 35 (3.4%)            | 0.23 |
|                      | Yes, Allergies and/or intolerances, and faith-based restrictions (e.g. Halal, Kosher, etc.) | 1 (6.7%)         | 2 (13.3%)        | 2 (13.3%)          | 6 (40.0%)          | 4 (26.7%)          | 15 (1.5%)            | 0.54 |
|                      | Yes, faith-based restrictions (e.g. Halal, Kosher, etc.)                                    | 3 (17.6%)        | 0 (0%)           | 6 (35.3%)          | 3 (17.6%)          | 5 (29.4%)          | 17 (1.7%)            | 0.54 |
|                      | Yes, food allergies and/or intolerances                                                     | 17 (6.5%)        | 31 (11.8%)       | 55 (21.0%)         | 94 (35.9%)         | 65 (24.8%)         | 262 (25.5%)          | 0.84 |
| Eating out Frequency | Monthly                                                                                     | 24 (7.9%)        | 20 (6.6%)        | 62 (20.5%)         | 115 (38.1%)        | 81 (26.8%)         | 302 (29.4%)          |      |
|                      | 2-3 times a week                                                                            | 11 (7.7%)        | 17 (12.0%)       | 34 (23.9%)         | 53 (37.3%)         | 27 (19.0%)         | 142 (13.8%)          | 0.27 |
|                      | Bi-weekly                                                                                   | 15 (5.7%)        | 24 (9.1%)        | 81 (30.6%)         | 81 (30.6%)         | 64 (24.2%)         | 265 (25.8%)          | 0.40 |
|                      | Daily                                                                                       | 1 (5.0%)         | 1 (5.0%)         | 4 (20.0%)          | 8 (40.0%)          | 6 (30.0%)          | 20 (1.9%)            | 0.14 |
|                      | Weekly                                                                                      | 28 (9.4%)        | 26 (8.7%)        | 68 (22.7%)         | 106 (35.5%)        | 71 (23.7%)         | 299 (29.1%)          | 0.56 |
|                      | <b>Total</b>                                                                                | <b>79 (7.7%)</b> | <b>88 (8.6%)</b> | <b>249 (24.2%)</b> | <b>363 (35.3%)</b> | <b>249 (24.2%)</b> | <b>1028 (100.0%)</b> |      |

**If the warning labels on the menu for each of the nutrients of concern are designed as below (Fig 2), do you agree that it is more effective than the FOPL for packaged foods?**

|           |                                       |           |           |            |             |            |             |       |
|-----------|---------------------------------------|-----------|-----------|------------|-------------|------------|-------------|-------|
| Age Group | The Silent Generation: Born 1928-1945 | 2 (8.0%)  | 0 (0%)    | 6 (24.0%)  | 5 (20.0%)   | 12 (48.0%) | 25 (2.4%)   |       |
|           | Baby Boomers: Born 1946-1964          | 17 (5.0%) | 17 (5.0%) | 79 (23.4%) | 127 (37.7%) | 97 (28.8%) | 337 (32.7%) | 0.09  |
|           | Generation X: Born 1965-1980          | 12 (5.2%) | 16 (6.9%) | 61 (26.4%) | 88 (38.1%)  | 54 (23.4%) | 231 (22.4%) | 0.02* |

|                |                                                |           |            |             |             |             |             |       |
|----------------|------------------------------------------------|-----------|------------|-------------|-------------|-------------|-------------|-------|
|                | Generation Z: Born 1997-2012                   | 2 (3.2%)  | 4 (6.3%)   | 16 (25.4%)  | 19 (30.2%)  | 22 (34.9%)  | 63 (6.1%)   | 0.24  |
|                | Millennials: Born 1981-1996                    | 24 (6.4%) | 41 (11.0%) | 70 (18.7%)  | 149 (39.8%) | 90 (24.1%)  | 374 (36.3%) | 0.02* |
|                | Prefer not to answer                           | 0 (0%)    | 0 (0%)     | 1 (100.0%)  | 0 (0%)      | 0 (0%)      | 1 (0.1%)    | 0.18  |
| Gender         | Male                                           | 25 (5.0%) | 32 (6.4%)  | 130 (25.8%) | 196 (39.0%) | 120 (23.9%) | 503 (48.8%) | 0.14  |
|                | Female                                         | 31 (6.0%) | 45 (8.7%)  | 101 (19.4%) | 190 (36.5%) | 153 (29.4%) | 520 (50.5%) |       |
|                | Other                                          | 0 (0%)    | 0 (0%)     | 1 (33.3%)   | 1 (33.3%)   | 1 (33.3%)   | 3 (0.3%)    |       |
|                | Prefer not to answer                           | 1 (25.0%) | 1 (25.0%)  | 1 (25.0%)   | 0 (0%)      | 1 (25.0%)   | 4 (0.4%)    |       |
| Marital Status | Single                                         | 16 (5.8%) | 30 (10.9%) | 58 (21.0%)  | 97 (35.1%)  | 75 (27.2%)  | 276 (26.8%) | 0.68  |
|                | Married                                        | 31 (5.0%) | 39 (6.2%)  | 149 (23.8%) | 242 (38.7%) | 164 (26.2%) | 625 (60.7%) |       |
|                | Separated / Divorced                           | 6 (7.7%)  | 4 (5.1%)   | 15 (19.2%)  | 28 (35.9%)  | 25 (32.1%)  | 78 (7.6%)   |       |
|                | Widowed                                        | 1 (4.3%)  | 1 (4.3%)   | 6 (26.1%)   | 9 (39.1%)   | 6 (26.1%)   | 23 (2.2%)   |       |
|                | Prefer not to answer                           | 2 (7.4%)  | 4 (14.8%)  | 5 (18.5%)   | 12 (44.4%)  | 4 (14.8%)   | 27 (2.6%)   |       |
| Education      | Did not graduate high school                   | 1 (6.7%)  | 2 (13.3%)  | 3 (20.0%)   | 3 (20.0%)   | 6 (40.0%)   | 15 (1.5%)   | 0.85  |
|                | Community college, technical college, or CEGEP | 14 (5.8%) | 12 (4.9%)  | 61 (25.1%)  | 103 (42.4%) | 53 (21.8%)  | 243 (23.6%) |       |
|                | High school graduate certificate or equivalent | 9 (6.9%)  | 9 (6.9%)   | 41 (31.3%)  | 32 (24.4%)  | 40 (30.5%)  | 131 (12.7%) |       |
|                | Post-graduate degree                           | 11 (6.2%) | 21 (11.8%) | 28 (15.7%)  | 65 (36.5%)  | 53 (29.8%)  | 178 (17.3%) |       |
|                | Trades certificate or diploma                  | 6 (7.1%)  | 6 (7.1%)   | 24 (28.6%)  | 34 (40.5%)  | 14 (16.7%)  | 84 (8.2%)   |       |
|                | University (undergraduate degree)              | 16 (4.2%) | 28 (7.4%)  | 76 (20.1%)  | 150 (39.6%) | 109 (28.8%) | 379 (36.8%) |       |
|                |                                                |           |            |             |             |             |             |       |
| Income         | Under \$25,000                                 | 3 (6.1%)  | 4 (8.2%)   | 13 (26.5%)  | 13 (26.5%)  | 16 (32.7%)  | 49 (4.8%)   | 0.36  |
|                | \$100,000 to \$124,000                         | 8 (6.0%)  | 12 (9.0%)  | 38 (28.6%)  | 41 (30.8%)  | 34 (25.6%)  | 133 (12.9%) |       |

|                                                                                                                           |                                                                                             |                  |                  |                    |                    |                    |                      |       |
|---------------------------------------------------------------------------------------------------------------------------|---------------------------------------------------------------------------------------------|------------------|------------------|--------------------|--------------------|--------------------|----------------------|-------|
|                                                                                                                           | \$125,000 to \$149,999                                                                      | 8 (6.6%)         | 10 (8.2%)        | 27 (22.1%)         | 55 (45.1%)         | 22 (18.0%)         | 122 (11.8%)          | 0.31  |
|                                                                                                                           | \$25,000 to \$49,999                                                                        | 11 (9.2%)        | 5 (4.2%)         | 25 (20.8%)         | 41 (34.2%)         | 38 (31.7%)         | 120 (11.6%)          | 0.95  |
|                                                                                                                           | \$50,000 to \$74,999                                                                        | 6 (4.0%)         | 16 (10.6%)       | 29 (19.2%)         | 56 (37.1%)         | 44 (29.1%)         | 151 (14.6%)          | 0.96  |
|                                                                                                                           | \$75,000 to \$99,999                                                                        | 4 (2.8%)         | 7 (4.9%)         | 40 (28.0%)         | 55 (38.5%)         | 37 (25.9%)         | 143 (13.9%)          | 1.00  |
|                                                                                                                           | Over \$150,000                                                                              | 8 (4.3%)         | 16 (8.6%)        | 28 (15.1%)         | 81 (43.5%)         | 53 (28.5%)         | 186 (18.0%)          | 0.76  |
|                                                                                                                           | Prefer not to answer                                                                        | 9 (7.1%)         | 8 (6.3%)         | 33 (26.0%)         | 46 (36.2%)         | 31 (24.4%)         | 127 (12.3%)          | 0.38  |
| Dietary Restriction                                                                                                       | No dietary restriction                                                                      | 33 (4.7%)        | 46 (6.6%)        | 162 (23.2%)        | 278 (39.8%)        | 180 (25.8%)        | 699 (67.9%)          | 0.01* |
|                                                                                                                           | Others                                                                                      | 6 (16.2%)        | 6 (16.2%)        | 7 (18.9%)          | 9 (24.3%)          | 9 (24.3%)          | 37 (3.6%)            |       |
|                                                                                                                           | Yes, Allergies and/or intolerances, and faith-based restrictions (e.g. Halal, Kosher, etc.) | 1 (6.7%)         | 3 (20.0%)        | 1 (6.7%)           | 6 (40.0%)          | 4 (26.7%)          | 15 (1.5%)            | 0.64  |
|                                                                                                                           | Yes, faith-based restrictions (e.g. Halal, Kosher, etc.)                                    | 0 (0%)           | 0 (0%)           | 2 (11.8%)          | 9 (52.9%)          | 6 (35.3%)          | 17 (1.7%)            | 0.13  |
|                                                                                                                           | Yes, food allergies and/or intolerances                                                     | 16 (6.1%)        | 23 (8.8%)        | 61 (23.3%)         | 86 (32.8%)         | 76 (29.0%)         | 262 (25.4%)          | 0.70  |
| Eating out Frequency                                                                                                      | Monthly                                                                                     | 18 (5.9%)        | 21 (6.9%)        | 74 (24.4%)         | 100 (33.0%)        | 90 (29.7%)         | 303 (29.4%)          | 0.47  |
|                                                                                                                           | 2-3 times a week                                                                            | 6 (4.2%)         | 10 (7.0%)        | 31 (21.8%)         | 60 (42.3%)         | 35 (24.6%)         | 142 (13.8%)          |       |
|                                                                                                                           | Bi-weekly                                                                                   | 11 (4.1%)        | 16 (6.0%)        | 64 (24.0%)         | 106 (39.7%)        | 70 (26.2%)         | 267 (25.9%)          | 0.73  |
|                                                                                                                           | Daily                                                                                       | 2 (10.0%)        | 2 (10.0%)        | 3 (15.0%)          | 7 (35.0%)          | 6 (30.0%)          | 20 (1.9%)            | 0.52  |
|                                                                                                                           | Weekly                                                                                      | 20 (6.7%)        | 29 (9.7%)        | 61 (20.4%)         | 115 (38.5%)        | 74 (24.7%)         | 299 (29.0%)          | 0.63  |
|                                                                                                                           | <b>Total</b>                                                                                | <b>57 (5.5%)</b> | <b>78 (7.6%)</b> | <b>233 (22.6%)</b> | <b>388 (37.6%)</b> | <b>275 (26.7%)</b> | <b>1031 (100.0%)</b> |       |
| <b>Consider the following statement: I am more inclined to eat at a restaurant that has labels displayed on the menu.</b> |                                                                                             |                  |                  |                    |                    |                    |                      |       |
| Age Group                                                                                                                 | The Silent Generation: Born 1928-1945                                                       | 5 (20.0%)        | 1 (4.0%)         | 14 (56.0%)         | 5 (20.0%)          | 0 (0%)             | 25 (2.4%)            | 0.57  |
|                                                                                                                           | Baby Boomers: Born 1946-1964                                                                | 47 (13.9%)       | 49 (14.5%)       | 141 (41.8%)        | 78 (23.1%)         | 22 (6.5%)          | 337 (32.7%)          |       |



|                      |                                                                                             |                    |                    |                    |                    |                  |                      |      |
|----------------------|---------------------------------------------------------------------------------------------|--------------------|--------------------|--------------------|--------------------|------------------|----------------------|------|
| Income               | Under \$25,000                                                                              | 9 (18.4%)          | 5 (10.2%)          | 23 (46.9%)         | 7 (14.3%)          | 5 (10.2%)        | 49 (4.7%)            |      |
|                      | \$100,000 to \$124,000                                                                      | 24 (18.0%)         | 19 (14.3%)         | 60 (45.1%)         | 23 (17.3%)         | 7 (5.3%)         | 133 (12.9%)          | 0.49 |
|                      | \$125,000 to \$149,999                                                                      | 21 (17.2%)         | 19 (15.6%)         | 50 (41.0%)         | 25 (20.5%)         | 7 (5.7%)         | 122 (11.8%)          | 0.68 |
|                      | \$25,000 to \$49,999                                                                        | 17 (14.2%)         | 14 (11.7%)         | 59 (49.2%)         | 20 (16.7%)         | 10 (8.3%)        | 120 (11.6%)          | 0.85 |
|                      | \$50,000 to \$74,999                                                                        | 19 (12.6%)         | 26 (17.2%)         | 65 (43.0%)         | 34 (22.5%)         | 7 (4.6%)         | 151 (14.6%)          | 1.00 |
|                      | \$75,000 to \$99,999                                                                        | 17 (11.8%)         | 19 (13.2%)         | 63 (43.8%)         | 35 (24.3%)         | 10 (6.9%)        | 144 (14.0%)          | 0.59 |
|                      | Over \$150,000                                                                              | 27 (14.5%)         | 28 (15.1%)         | 70 (37.6%)         | 46 (24.7%)         | 15 (8.1%)        | 186 (18.0%)          | 0.67 |
|                      | Prefer not to answer                                                                        | 15 (11.8%)         | 14 (11.0%)         | 65 (51.2%)         | 26 (20.5%)         | 7 (5.5%)         | 127 (12.3%)          | 0.91 |
| Dietary Restriction  | No dietary restriction                                                                      | 107 (15.3%)        | 104 (14.9%)        | 313 (44.7%)        | 136 (19.4%)        | 40 (5.7%)        | 700 (67.9%)          |      |
|                      | Others                                                                                      | 4 (10.8%)          | 8 (21.6%)          | 15 (40.5%)         | 5 (13.5%)          | 5 (13.5%)        | 37 (3.6%)            | 0.80 |
|                      | Yes, Allergies and/or intolerances, and faith-based restrictions (e.g. Halal, Kosher, etc.) | 1 (6.7%)           | 2 (13.3%)          | 5 (33.3%)          | 6 (40.0%)          | 1 (6.7%)         | 15 (1.5%)            | 0.21 |
|                      | Yes, faith-based restrictions (e.g. Halal, Kosher, etc.)                                    | 2 (11.8%)          | 1 (5.9%)           | 6 (35.3%)          | 5 (29.4%)          | 3 (17.6%)        | 17 (1.6%)            | 0.06 |
|                      | Yes, food allergies and/or intolerances                                                     | 35 (13.4%)         | 29 (11.1%)         | 116 (44.3%)        | 63 (24.0%)         | 19 (7.3%)        | 262 (25.4%)          | 0.05 |
| Eating out Frequency | Monthly                                                                                     | 43 (14.2%)         | 39 (12.9%)         | 141 (46.5%)        | 62 (20.5%)         | 18 (5.9%)        | 303 (29.4%)          |      |
|                      | 2-3 times a week                                                                            | 24 (16.9%)         | 18 (12.7%)         | 63 (44.4%)         | 31 (21.8%)         | 6 (4.2%)         | 142 (13.8%)          | 0.55 |
|                      | Bi-weekly                                                                                   | 44 (16.4%)         | 45 (16.8%)         | 108 (40.3%)        | 51 (19.0%)         | 20 (7.5%)        | 268 (26.0%)          | 0.42 |
|                      | Daily                                                                                       | 1 (5.0%)           | 2 (10.0%)          | 10 (50.0%)         | 4 (20.0%)          | 3 (15.0%)        | 20 (1.9%)            | 0.06 |
|                      | Weekly                                                                                      | 37 (12.4%)         | 40 (13.4%)         | 133 (44.5%)        | 68 (22.7%)         | 21 (7.0%)        | 299 (29.0%)          | 0.45 |
|                      | <b>Total</b>                                                                                | <b>149 (14.4%)</b> | <b>144 (14.0%)</b> | <b>455 (44.1%)</b> | <b>216 (20.9%)</b> | <b>68 (6.6%)</b> | <b>1032 (100.0%)</b> |      |

**Consider the following statement: I am willing to pay more for a meal at a restaurant to avoid menu items with warning labels.**

|                |                                                |             |             |             |            |           |             |      |
|----------------|------------------------------------------------|-------------|-------------|-------------|------------|-----------|-------------|------|
| Age Group      | The Silent Generation: Born 1928-1945          | 7 (28.0%)   | 4 (16.0%)   | 13 (52.0%)  | 1 (4.0%)   | 0 (0%)    | 25 (2.4%)   |      |
|                | Baby Boomers: Born 1946-1964                   | 117 (34.8%) | 80 (23.8%)  | 93 (27.7%)  | 38 (11.3%) | 8 (2.4%)  | 336 (32.6%) | 0.45 |
|                | Generation X: Born 1965-1980                   | 76 (32.9%)  | 49 (21.2%)  | 64 (27.7%)  | 34 (14.7%) | 8 (3.5%)  | 231 (22.4%) | 0.73 |
|                | Generation Z: Born 1997-2012                   | 15 (23.8%)  | 20 (31.7%)  | 16 (25.4%)  | 10 (15.9%) | 2 (3.2%)  | 63 (6.1%)   | 0.81 |
|                | Millennials: Born 1981-1996                    | 117 (31.2%) | 89 (23.7%)  | 107 (28.5%) | 53 (14.1%) | 9 (2.4%)  | 375 (36.4%) | 0.68 |
|                | Prefer not to answer                           | 1 (100.0%)  | 0 (0%)      | 0 (0%)      | 0 (0%)     | 0 (0%)    | 1 (0.1%)    |      |
| Gender         | Male                                           | 168 (33.5%) | 126 (25.1%) | 140 (27.9%) | 61 (12.2%) | 7 (1.4%)  | 502 (48.7%) |      |
|                | Female                                         | 162 (31.1%) | 114 (21.9%) | 151 (29.0%) | 74 (14.2%) | 20 (3.8%) | 521 (50.6%) | 0.05 |
|                | Other                                          | 1 (33.3%)   | 1 (33.3%)   | 1 (33.3%)   | 0 (0%)     | 0 (0%)    | 3 (0.3%)    | 0.86 |
|                | Prefer not to answer                           | 2 (50.0%)   | 0 (0%)      | 1 (25.0%)   | 1 (25.0%)  | 0 (0%)    | 4 (0.4%)    | 0.89 |
| Marital Status | Single                                         | 89 (32.2%)  | 75 (27.2%)  | 74 (26.8%)  | 30 (10.9%) | 8 (2.9%)  | 276 (26.8%) |      |
|                | Married                                        | 200 (32.0%) | 139 (22.2%) | 186 (29.8%) | 85 (13.6%) | 15 (2.4%) | 625 (60.7%) | 0.20 |
|                | Separated / Divorced                           | 27 (34.6%)  | 16 (20.5%)  | 20 (25.6%)  | 14 (17.9%) | 1 (1.3%)  | 78 (7.6%)   | 0.28 |
|                | Widowed                                        | 10 (43.5%)  | 6 (26.1%)   | 4 (17.4%)   | 1 (4.3%)   | 2 (8.7%)  | 23 (2.2%)   | 0.58 |
|                | Prefer not to answer                           | 6 (22.2%)   | 6 (22.2%)   | 8 (29.6%)   | 6 (22.2%)  | 1 (3.7%)  | 27 (2.6%)   | 0.07 |
| Education      | Did not graduate high school                   | 6 (40.0%)   | 4 (26.7%)   | 3 (20.0%)   | 2 (13.3%)  | 0 (0%)    | 15 (1.5%)   |      |
|                | Community college, technical college, or CEGEP | 80 (33.1%)  | 59 (24.4%)  | 71 (29.3%)  | 24 (9.9%)  | 8 (3.3%)  | 242 (23.5%) | 0.54 |
|                | High school graduate certificate or equivalent | 44 (33.6%)  | 29 (22.1%)  | 42 (32.1%)  | 14 (10.7%) | 2 (1.5%)  | 131 (12.7%) | 0.56 |
|                | Post-graduate degree                           | 62 (34.8%)  | 46 (25.8%)  | 38 (21.3%)  | 29 (16.3%) | 3 (1.7%)  | 178 (17.3%) | 0.59 |

|                      |                                                                                             |             |             |             |            |           |             |       |
|----------------------|---------------------------------------------------------------------------------------------|-------------|-------------|-------------|------------|-----------|-------------|-------|
|                      | Trades certificate or diploma                                                               | 30 (35.7%)  | 17 (20.2%)  | 28 (33.3%)  | 8 (9.5%)   | 1 (1.2%)  | 84 (8.2%)   | 0.60  |
|                      | University (undergraduate degree)                                                           | 111 (29.2%) | 87 (22.9%)  | 110 (28.9%) | 59 (15.5%) | 13 (3.4%) | 380 (36.9%) | 0.31  |
| Income               | Under \$25,000                                                                              | 19 (39.6%)  | 10 (20.8%)  | 12 (25.0%)  | 7 (14.6%)  | 0 (0%)    | 48 (4.7%)   |       |
|                      | \$100,000 to \$124,000                                                                      | 46 (34.6%)  | 30 (22.6%)  | 32 (24.1%)  | 20 (15.0%) | 5 (3.8%)  | 133 (12.9%) | 0.58  |
|                      | \$125,000 to \$149,999                                                                      | 44 (36.1%)  | 26 (21.3%)  | 34 (27.9%)  | 13 (10.7%) | 5 (4.1%)  | 122 (11.8%) | 0.77  |
|                      | \$25,000 to \$49,999                                                                        | 43 (35.8%)  | 23 (19.2%)  | 37 (30.8%)  | 16 (13.3%) | 1 (0.8%)  | 120 (11.6%) | 0.58  |
|                      | \$50,000 to \$74,999                                                                        | 51 (33.8%)  | 39 (25.8%)  | 40 (26.5%)  | 19 (12.6%) | 2 (1.3%)  | 151 (14.6%) | 0.57  |
|                      | \$75,000 to \$99,999                                                                        | 36 (25.0%)  | 46 (31.9%)  | 37 (25.7%)  | 21 (14.6%) | 4 (2.8%)  | 144 (14.0%) | 0.22  |
|                      | Over \$150,000                                                                              | 56 (30.1%)  | 42 (22.6%)  | 56 (30.1%)  | 24 (12.9%) | 8 (4.3%)  | 186 (18.0%) | 0.33  |
|                      | Prefer not to answer                                                                        | 38 (29.9%)  | 26 (20.5%)  | 45 (35.4%)  | 16 (12.6%) | 2 (1.6%)  | 127 (12.3%) | 0.28  |
| Dietary Restriction  |                                                                                             | 228 (32.6%) | 176 (25.2%) | 189 (27.0%) | 89 (12.7%) | 17 (2.4%) | 699 (67.9%) |       |
|                      | No dietary restriction                                                                      | 10 (27.0%)  | 7 (18.9%)   | 13 (35.1%)  | 6 (16.2%)  | 1 (2.7%)  | 37 (3.6%)   | 0.23  |
|                      | Others                                                                                      |             |             |             |            |           |             |       |
|                      | Yes, Allergies and/or intolerances, and faith-based restrictions (e.g. Halal, Kosher, etc.) | 2 (13.3%)   | 4 (26.7%)   | 5 (33.3%)   | 2 (13.3%)  | 2 (13.3%) | 15 (1.5%)   | 0.10  |
|                      | Yes, faith-based restrictions (e.g. Halal, Kosher, etc.)                                    | 3 (17.6%)   | 4 (23.5%)   | 9 (52.9%)   | 1 (5.9%)   | 0 (0%)    | 17 (1.7%)   | 0.69  |
|                      | Yes, food allergies and/or intolerances                                                     | 90 (34.4%)  | 51 (19.5%)  | 76 (29.0%)  | 38 (14.5%) | 7 (2.7%)  | 262 (25.4%) | 0.93  |
| Eating out Frequency |                                                                                             | 106 (35.1%) | 68 (22.5%)  | 89 (29.5%)  | 34 (11.3%) | 5 (1.7%)  | 302 (29.3%) |       |
|                      | Monthly                                                                                     | 40 (28.2%)  | 33 (23.2%)  | 45 (31.7%)  | 20 (14.1%) | 4 (2.8%)  | 142 (13.8%) | 0.21  |
|                      | 2-3 times a week                                                                            | 87 (32.5%)  | 65 (24.3%)  | 78 (29.1%)  | 29 (10.8%) | 9 (3.4%)  | 268 (26.0%) | 0.53  |
|                      | Bi-weekly                                                                                   | 5 (25.0%)   | 3 (15.0%)   | 5 (25.0%)   | 5 (25.0%)  | 2 (10.0%) | 20 (1.9%)   | 0.02* |
|                      | Daily                                                                                       |             |             |             |            |           |             |       |

|              |                    |                    |                    |                    |                  |                      |      |
|--------------|--------------------|--------------------|--------------------|--------------------|------------------|----------------------|------|
| Weekly       | 95 (31.8%)         | 73 (24.4%)         | 76 (25.4%)         | 48 (16.1%)         | 7 (2.3%)         | 299 (29.0%)          | 0.48 |
| <b>Total</b> | <b>333 (32.3%)</b> | <b>242 (23.5%)</b> | <b>293 (28.4%)</b> | <b>136 (13.2%)</b> | <b>27 (2.6%)</b> | <b>1031 (100.0%)</b> |      |

|                      |                                                |           |            |             |             |             |             |             |         |
|----------------------|------------------------------------------------|-----------|------------|-------------|-------------|-------------|-------------|-------------|---------|
| Age Group            | The Silent Generation: Born 1928-1945          | 2 (8.0%)  | 2 (8.0%)   | 8 (32.0%)   | 9 (36.0%)   | 4 (16.0%)   | 25 (2.4%)   |             |         |
|                      | Baby Boomers: Born 1946-1964                   | 21 (6.3%) | 38 (11.3%) | 53 (15.8%)  | 160 (47.8%) | 63 (18.8%)  | 335 (32.7%) | 0.27        |         |
|                      | Generation X: Born 1965-1980                   | 22 (9.6%) | 26 (11.4%) | 41 (18.0%)  | 101 (44.3%) | 38 (16.7%)  | 228 (22.3%) | 0.94        |         |
|                      | Generation Z: Born 1997-2012                   | 1 (1.6%)  | 5 (7.9%)   | 8 (12.7%)   | 35 (55.6%)  | 14 (22.2%)  | 63 (6.2%)   | 0.19        |         |
|                      | Millennials: Born 1981-1996                    | 22 (5.9%) | 44 (11.8%) | 76 (20.4%)  | 176 (47.3%) | 54 (14.5%)  | 372 (36.3%) | 0.94        |         |
|                      | Prefer not to answer                           | 0 (0%)    | 0 (0%)     | 0 (0%)      | 1 (100.0%)  | 0 (0%)      | 1 (0.1%)    | 0.57        |         |
|                      | Gender                                         | Male      | 39 (7.8%)  | 57 (11.4%)  | 103 (20.7%) | 230 (46.2%) | 69 (13.9%)  | 498 (48.6%) |         |
|                      |                                                | Female    | 28 (5.4%)  | 58 (11.2%)  | 83 (16.0%)  | 247 (47.6%) | 103 (19.8%) | 519 (50.7%) | 0.003** |
| Other                |                                                | 0 (0%)    | 0 (0%)     | 0 (0%)      | 2 (66.7%)   | 1 (33.3%)   | 3 (0.3%)    | 0.07        |         |
| Prefer not to answer |                                                | 1 (25.0%) | 0 (0%)     | 0 (0%)      | 3 (75.0%)   | 0 (0%)      | 4 (0.4%)    | 0.89        |         |
| Marital Status       | Single                                         | 18 (6.6%) | 26 (9.5%)  | 49 (17.9%)  | 132 (48.4%) | 48 (17.6%)  | 273 (26.7%) |             |         |
|                      | Married                                        | 39 (6.3%) | 75 (12.0%) | 115 (18.5%) | 289 (46.4%) | 105 (16.9%) | 623 (61.0%) | 0.75        |         |
|                      | Separated / Divorced                           | 6 (7.9%)  | 8 (10.5%)  | 13 (17.1%)  | 34 (44.7%)  | 15 (19.7%)  | 76 (7.4%)   | 0.75        |         |
|                      | Widowed                                        | 3 (13.0%) | 2 (8.7%)   | 3 (13.0%)   | 12 (52.2%)  | 3 (13.0%)   | 23 (2.3%)   | 0.36        |         |
|                      | Prefer not to answer                           | 2 (7.4%)  | 3 (11.1%)  | 6 (22.2%)   | 14 (51.9%)  | 2 (7.4%)    | 27 (2.6%)   | 0.21        |         |
| Education            | Did not graduate high school                   | 1 (6.7%)  | 3 (20.0%)  | 3 (20.0%)   | 6 (40.0%)   | 2 (13.3%)   | 15 (1.5%)   |             |         |
|                      | Community college, technical college, or CEGEP | 19 (7.9%) | 28 (11.7%) | 45 (18.8%)  | 107 (44.6%) | 41 (17.1%)  | 240 (23.5%) | 0.48        |         |



|                     |                                                                                             |            |            |             |             |             |             |      |
|---------------------|---------------------------------------------------------------------------------------------|------------|------------|-------------|-------------|-------------|-------------|------|
|                     | High school graduate certificate or equivalent                                              | 14 (10.7%) | 9 (6.9%)   | 25 (19.1%)  | 59 (45.0%)  | 24 (18.3%)  | 131 (12.8%) | 0.43 |
|                     | Post-graduate degree                                                                        | 12 (6.7%)  | 32 (18.0%) | 25 (14.0%)  | 79 (44.4%)  | 30 (16.9%)  | 178 (17.4%) | 0.49 |
|                     | Trades certificate or diploma                                                               | 7 (8.5%)   | 8 (9.8%)   | 21 (25.6%)  | 38 (46.3%)  | 8 (9.8%)    | 82 (8.0%)   | 0.85 |
|                     | University (undergraduate degree)                                                           | 15 (4.0%)  | 35 (9.3%)  | 66 (17.5%)  | 193 (51.2%) | 68 (18.0%)  | 377 (36.9%) | 0.19 |
| Income              | Under \$25,000                                                                              | 5 (10.4%)  | 3 (6.2%)   | 9 (18.8%)   | 18 (37.5%)  | 13 (27.1%)  | 48 (4.7%)   |      |
|                     | \$100,000 to \$124,000                                                                      | 12 (9.0%)  | 11 (8.3%)  | 21 (15.8%)  | 67 (50.4%)  | 22 (16.5%)  | 133 (13.0%) | 0.48 |
|                     | \$125,000 to \$149,999                                                                      | 8 (6.6%)   | 15 (12.3%) | 23 (18.9%)  | 55 (45.1%)  | 21 (17.2%)  | 122 (11.9%) | 0.41 |
|                     | \$25,000 to \$49,999                                                                        | 8 (6.7%)   | 9 (7.6%)   | 22 (18.5%)  | 58 (48.7%)  | 22 (18.5%)  | 119 (11.6%) | 0.86 |
|                     | \$50,000 to \$74,999                                                                        | 9 (6.0%)   | 20 (13.4%) | 27 (18.1%)  | 67 (45.0%)  | 26 (17.4%)  | 149 (14.6%) | 0.40 |
|                     | \$75,000 to \$99,999                                                                        | 8 (5.7%)   | 22 (15.6%) | 30 (21.3%)  | 64 (45.4%)  | 17 (12.1%)  | 141 (13.8%) | 0.09 |
|                     | Over \$150,000                                                                              | 11 (5.9%)  | 25 (13.5%) | 27 (14.6%)  | 87 (47.0%)  | 35 (18.9%)  | 185 (18.1%) | 0.67 |
|                     | Prefer not to answer                                                                        | 7 (5.5%)   | 10 (7.9%)  | 27 (21.3%)  | 66 (52.0%)  | 17 (13.4%)  | 127 (12.4%) | 0.29 |
| Dietary Restriction | No dietary restriction                                                                      | 47 (6.8%)  | 73 (10.5%) | 129 (18.6%) | 336 (48.4%) | 109 (15.7%) | 694 (67.8%) |      |
|                     | Others                                                                                      | 3 (8.1%)   | 8 (21.6%)  | 3 (8.1%)    | 16 (43.2%)  | 7 (18.9%)   | 37 (3.6%)   | 0.58 |
|                     | Yes, Allergies and/or intolerances, and faith-based restrictions (e.g. Halal, Kosher, etc.) | 0 (0%)     | 0 (0%)     | 4 (26.7%)   | 7 (46.7%)   | 4 (26.7%)   | 15 (1.5%)   | 0.28 |
|                     | Yes, faith-based restrictions (e.g. Halal, Kosher, etc.)                                    | 2 (11.8%)  | 2 (11.8%)  | 3 (17.6%)   | 7 (41.2%)   | 3 (17.6%)   | 17 (1.7%)   | 0.41 |
|                     | Yes, food allergies and/or intolerances                                                     | 16 (6.1%)  | 32 (12.3%) | 47 (18.0%)  | 116 (44.4%) | 50 (19.2%)  | 261 (25.5%) | 0.98 |
|                     | Monthly                                                                                     | 27 (8.9%)  | 33 (10.9%) | 51 (16.8%)  | 152 (50.2%) | 40 (13.2%)  | 303 (29.6%) |      |

|                      |                  |                  |                    |                    |                    |                    |                      |         |
|----------------------|------------------|------------------|--------------------|--------------------|--------------------|--------------------|----------------------|---------|
| Eating out Frequency | 2-3 times a week | 6 (4.3%)         | 17 (12.1%)         | 23 (16.4%)         | 69 (49.3%)         | 25 (17.9%)         | 140 (13.7%)          | 0.09    |
|                      | Bi-weekly        | 19 (7.2%)        | 35 (13.3%)         | 58 (22.1%)         | 108 (41.1%)        | 43 (16.3%)         | 263 (25.7%)          | 0.84    |
|                      | Daily            | 1 (5.0%)         | 1 (5.0%)           | 5 (25.0%)          | 9 (45.0%)          | 4 (20.0%)          | 20 (2.0%)            | 0.19    |
|                      | Weekly           | 15 (5.0%)        | 29 (9.7%)          | 49 (16.4%)         | 144 (48.3%)        | 61 (20.5%)         | 298 (29.1%)          | 0.006** |
|                      | <b>Total</b>     | <b>68 (6.6%)</b> | <b>115 (11.2%)</b> | <b>186 (18.2%)</b> | <b>482 (47.1%)</b> | <b>173 (16.9%)</b> | <b>1024 (100.0%)</b> |         |

**Consider the following statement: If I see a warning label on a menu item, I will still consider buying it/going to that restaurant.**

|                |                                       |           |            |             |             |             |             |      |
|----------------|---------------------------------------|-----------|------------|-------------|-------------|-------------|-------------|------|
| Age Group      | The Silent Generation: Born 1928-1945 | 0 (0%)    | 4 (16.0%)  | 9 (36.0%)   | 8 (32.0%)   | 4 (16.0%)   | 25 (2.4%)   |      |
|                | Baby Boomers: Born 1946-1964          | 11 (3.3%) | 37 (11.0%) | 90 (26.8%)  | 152 (45.2%) | 46 (13.7%)  | 336 (32.6%) | 0.92 |
|                | Generation X: Born 1965-1980          | 5 (2.2%)  | 15 (6.5%)  | 66 (28.6%)  | 99 (42.9%)  | 46 (19.9%)  | 231 (22.4%) | 0.49 |
|                | Generation Z: Born 1997-2012          | 1 (1.6%)  | 6 (9.5%)   | 17 (27.0%)  | 25 (39.7%)  | 14 (22.2%)  | 63 (6.1%)   | 0.40 |
|                | Millennials: Born 1981-1996           | 11 (2.9%) | 27 (7.2%)  | 96 (25.7%)  | 159 (42.5%) | 81 (21.7%)  | 374 (36.3%) | 0.42 |
|                | Prefer not to answer                  | 0 (0%)    | 0 (0%)     | 0 (0%)      | 1 (100.0%)  | 0 (0%)      | 1 (0.1%)    | 0.35 |
|                |                                       |           |            |             |             |             |             |      |
| Gender         | Male                                  | 15 (3.0%) | 36 (7.2%)  | 148 (29.5%) | 209 (41.7%) | 93 (18.6%)  | 501 (48.7%) |      |
|                | Female                                | 12 (2.3%) | 53 (10.2%) | 127 (24.4%) | 233 (44.7%) | 96 (18.4%)  | 521 (50.6%) | 0.44 |
|                | Other                                 | 1 (33.3%) | 0 (0%)     | 2 (66.7%)   | 0 (0%)      | 0 (0%)      | 3 (0.3%)    | 0.05 |
|                | Prefer not to answer                  | 0 (0%)    | 0 (0%)     | 0 (0%)      | 2 (50.0%)   | 2 (50.0%)   | 4 (0.4%)    | 0.08 |
| Marital Status | Single                                | 9 (3.3%)  | 24 (8.7%)  | 75 (27.2%)  | 109 (39.5%) | 59 (21.4%)  | 276 (26.8%) |      |
|                | Married                               | 13 (2.1%) | 52 (8.3%)  | 161 (25.8%) | 287 (46.0%) | 111 (17.8%) | 624 (60.7%) | 0.51 |
|                | Separated / Divorced                  | 3 (3.8%)  | 7 (9.0%)   | 24 (30.8%)  | 27 (34.6%)  | 17 (21.8%)  | 78 (7.6%)   | 0.78 |
|                | Widowed                               | 1 (4.3%)  | 3 (13.0%)  | 9 (39.1%)   | 9 (39.1%)   | 1 (4.3%)    | 23 (2.2%)   | 0.17 |
|                | Prefer not to answer                  | 2 (7.4%)  | 3 (11.1%)  | 9 (33.3%)   | 11 (40.7%)  | 2 (7.4%)    | 27 (2.6%)   | 0.10 |
| Education      | Did not graduate high school          | 0 (0%)    | 6 (40.0%)  | 4 (26.7%)   | 3 (20.0%)   | 2 (13.3%)   | 15 (1.5%)   |      |

|                     |                                                                                             |           |            |             |             |             |             |       |
|---------------------|---------------------------------------------------------------------------------------------|-----------|------------|-------------|-------------|-------------|-------------|-------|
|                     | Community college, technical college, or CEGEP                                              | 4 (1.6%)  | 23 (9.5%)  | 70 (28.8%)  | 102 (42.0%) | 44 (18.1%)  | 243 (23.6%) | 0.02* |
|                     | High school graduate certificate or equivalent                                              | 4 (3.1%)  | 10 (7.6%)  | 38 (29.0%)  | 54 (41.2%)  | 25 (19.1%)  | 131 (12.7%) | 0.02* |
|                     | Post-graduate degree                                                                        | 7 (4.0%)  | 15 (8.5%)  | 40 (22.6%)  | 78 (44.1%)  | 37 (20.9%)  | 177 (17.2%) | 0.02* |
|                     | Trades certificate or diploma                                                               | 3 (3.6%)  | 4 (4.8%)   | 27 (32.1%)  | 36 (42.9%)  | 14 (16.7%)  | 84 (8.2%)   | 0.04* |
|                     | University (undergraduate degree)                                                           | 10 (2.6%) | 31 (8.2%)  | 98 (25.9%)  | 171 (45.1%) | 69 (18.2%)  | 379 (36.8%) | 0.02* |
| Income              | Under \$25,000                                                                              | 0 (0%)    | 5 (10.2%)  | 14 (28.6%)  | 22 (44.9%)  | 8 (16.3%)   | 49 (4.8%)   |       |
|                     | \$100,000 to \$124,000                                                                      | 5 (3.8%)  | 6 (4.5%)   | 40 (30.1%)  | 49 (36.8%)  | 33 (24.8%)  | 133 (12.9%) | 0.76  |
|                     | \$125,000 to \$149,999                                                                      | 2 (1.7%)  | 4 (3.3%)   | 36 (29.8%)  | 52 (43.0%)  | 27 (22.3%)  | 121 (11.7%) | 0.70  |
|                     | \$25,000 to \$49,999                                                                        | 4 (3.3%)  | 12 (10.0%) | 29 (24.2%)  | 55 (45.8%)  | 20 (16.7%)  | 120 (11.7%) | 0.95  |
|                     | \$50,000 to \$74,999                                                                        | 7 (4.6%)  | 18 (11.9%) | 32 (21.2%)  | 67 (44.4%)  | 27 (17.9%)  | 151 (14.7%) | 0.95  |
|                     | \$75,000 to \$99,999                                                                        | 6 (4.2%)  | 18 (12.6%) | 34 (23.8%)  | 60 (42.0%)  | 25 (17.5%)  | 143 (13.9%) | 0.56  |
|                     | Over \$150,000                                                                              | 1 (0.5%)  | 17 (9.1%)  | 48 (25.8%)  | 84 (45.2%)  | 36 (19.4%)  | 186 (18.1%) | 0.87  |
|                     | Prefer not to answer                                                                        | 3 (2.4%)  | 9 (7.1%)   | 45 (35.4%)  | 55 (43.3%)  | 15 (11.8%)  | 127 (12.3%) | 0.39  |
| Dietary Restriction | No dietary restriction                                                                      | 18 (2.6%) | 55 (7.9%)  | 195 (27.9%) | 306 (43.8%) | 125 (17.9%) | 699 (67.9%) |       |
|                     | Others                                                                                      | 0 (0%)    | 1 (2.7%)   | 11 (29.7%)  | 19 (51.4%)  | 6 (16.2%)   | 37 (3.6%)   | 0.47  |
|                     | Yes, Allergies and/or intolerances, and faith-based restrictions (e.g. Halal, Kosher, etc.) | 1 (6.7%)  | 1 (6.7%)   | 6 (40.0%)   | 5 (33.3%)   | 2 (13.3%)   | 15 (1.5%)   | 0.27  |
|                     | Yes, faith-based restrictions (e.g. Halal, Kosher, etc.)                                    | 2 (11.8%) | 1 (5.9%)   | 4 (23.5%)   | 7 (41.2%)   | 3 (17.6%)   | 17 (1.7%)   | 0.37  |

|                         |                                            |                  |                  |                    |                    |                    |                      |      |
|-------------------------|--------------------------------------------|------------------|------------------|--------------------|--------------------|--------------------|----------------------|------|
|                         | Yes, food allergies<br>and/or intolerances | 6 (2.3%)         | 31 (11.9%)       | 62 (23.8%)         | 107 (41.0%)        | 55 (21.1%)         | 261 (25.4%)          | 0.97 |
| Eating out<br>Frequency | Monthly                                    | 9 (3.0%)         | 21 (6.9%)        | 93 (30.7%)         | 137 (45.2%)        | 43 (14.2%)         | 303 (29.4%)          |      |
|                         | 2-3 times a week                           | 3 (2.1%)         | 13 (9.2%)        | 33 (23.2%)         | 56 (39.4%)         | 37 (26.1%)         | 142 (13.8%)          | 0.13 |
|                         | Bi-weekly                                  | 8 (3.0%)         | 27 (10.1%)       | 67 (25.0%)         | 116 (43.3%)        | 50 (18.7%)         | 268 (26.0%)          | 0.88 |
|                         | Daily                                      | 1 (5.3%)         | 1 (5.3%)         | 3 (15.8%)          | 9 (47.4%)          | 5 (26.3%)          | 19 (1.8%)            | 0.33 |
|                         | Weekly                                     | 7 (2.3%)         | 27 (9.1%)        | 82 (27.5%)         | 126 (42.3%)        | 56 (18.8%)         | 298 (28.9%)          | 0.96 |
|                         | <b>Total</b>                               | <b>28 (2.7%)</b> | <b>89 (8.6%)</b> | <b>277 (26.9%)</b> | <b>444 (43.1%)</b> | <b>191 (18.6%)</b> | <b>1029 (100.0%)</b> |      |

*Note: Frequency and percentage were reported. Logistic ordinal regression was used to assess the difference with the reference level (first level in each group). \* $p < 0.05$ , \*\*  $p < 0.1$ , \*\*\* $p < 0.0001$ .*
